# Supplementary material for: Impact of the COVID-19 Pandemic on the Incidence and Thickness of Cutaneous Melanoma in Belgium
Source: MDPI journal article supplement (doi:10.3390/biomedicines11061645), 2023-06-06
Supplement: s1 [file s1]

## Supplementary Data

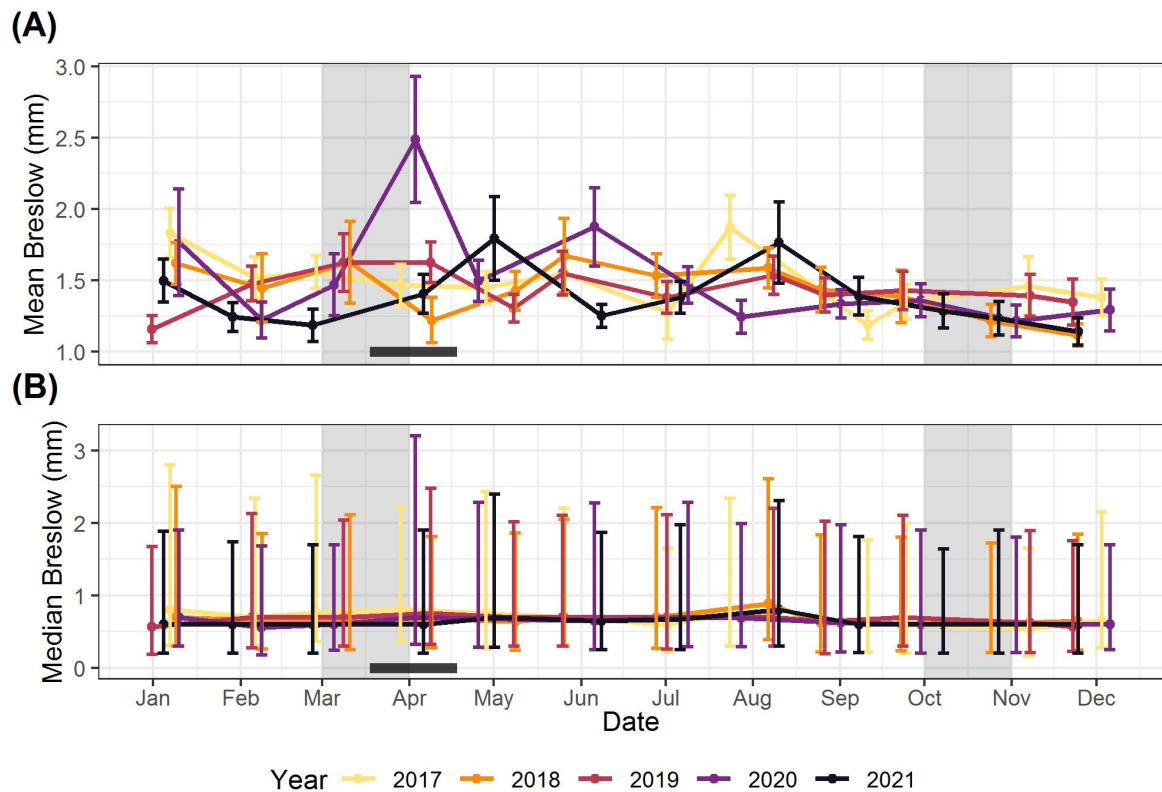

**Figure S1.** Evolution in monthly mean (a) and median (b) Breslow value for different registration years separately. 25th and 75th percentiles are shown with brackets. In (b) random jitter was added to x-axis values to improve clarity. The grey areas correspond to the periods in 2020 in which an exponential growth in the number of COVID-19 infections was observed; the bold black line corresponds to the period in 2020 in which the stringent lockdown took place.

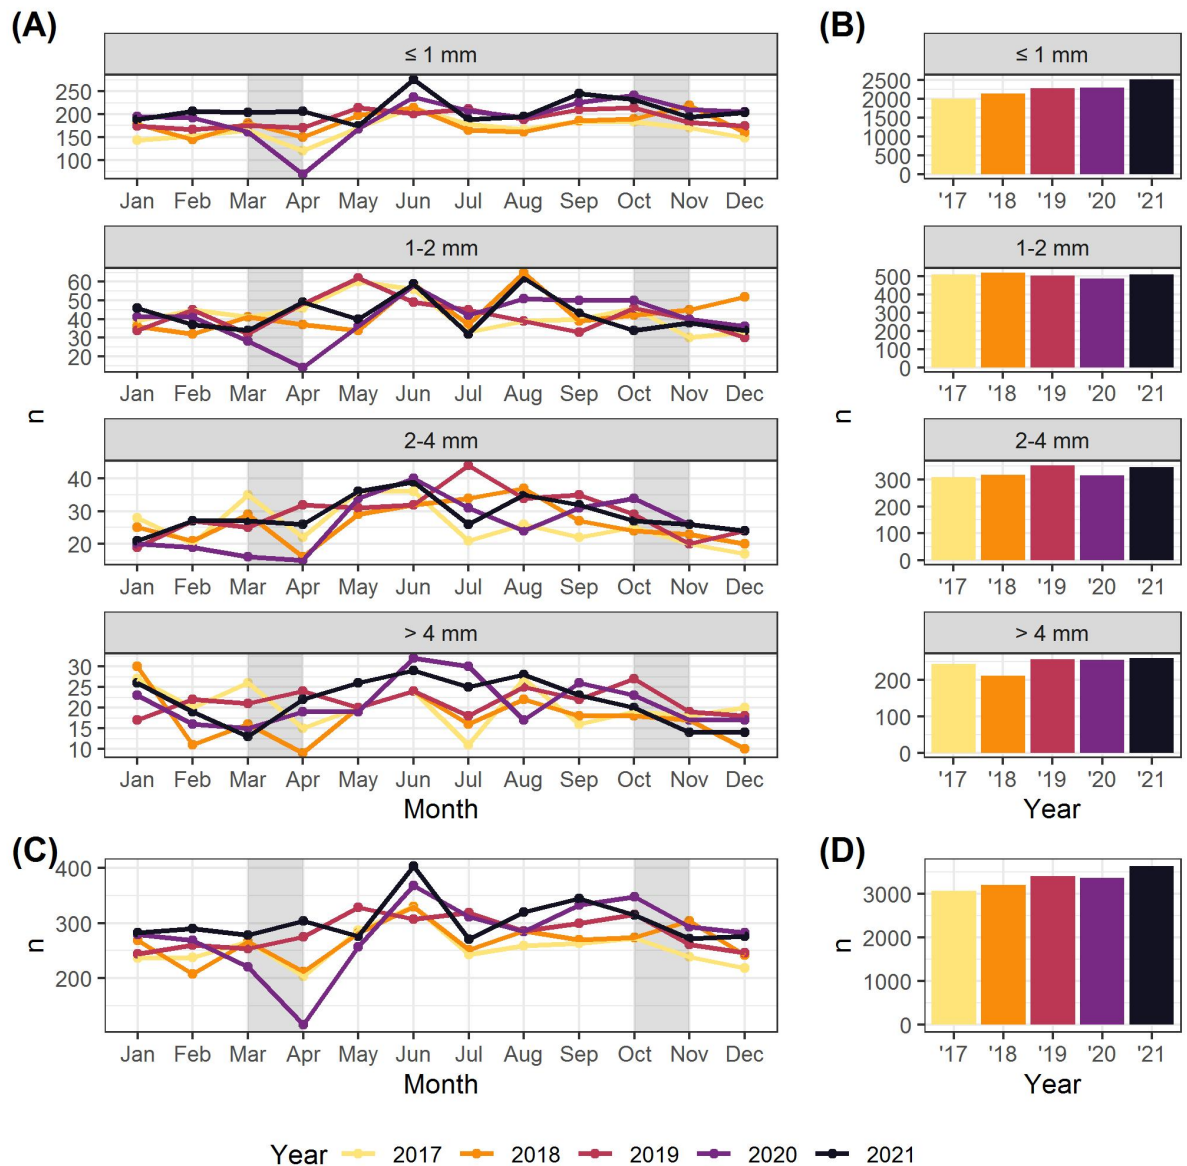

**Figure S2.** Evolution in monthly (A) and annual (B) number of melanoma diagnoses, broken down according to predefined Breslow groups ( $[0,1]$ ,  $[1,2]$ ,  $[2,4]$ ,  $[4,\infty]$ ). The grey areas correspond to the periods in 2020 in which an exponential growth in the number of COVID-19 infections was observed.

**Table S1.** Absolute and relative difference in number of cutaneous melanoma diagnoses compared to the previous year, by Breslow thickness.

|                                                                                     | <b>Breslow<br/>subgroup</b> | <b>2017</b> | <b>2018</b> | <b>2019</b> | <b>2020</b>  | <b>2021</b> |
|-------------------------------------------------------------------------------------|-----------------------------|-------------|-------------|-------------|--------------|-------------|
| Absolute<br>number of<br>diagnoses                                                  | [0,1[                       | 1999        | 2147        | 2284        | 2307         | 2517        |
|                                                                                     | [1,2[                       | 508         | 519         | 503         | 487          | 508         |
|                                                                                     | [2,4[                       | 308         | 317         | 352         | 314          | 346         |
|                                                                                     | [4, ∞[                      | 243         | 211         | 257         | 254          | 259         |
|                                                                                     | <b>Total</b>                | <b>3058</b> | <b>3194</b> | <b>3396</b> | <b>3362</b>  | <b>3630</b> |
| Absolute<br>difference in<br>number of<br>diagnoses<br>compared to<br>previous year | [0,1[                       | n.a.        | 148         | 137         | 23           | 210         |
|                                                                                     | [1,2[                       | n.a.        | 11          | -16         | -16          | 21          |
|                                                                                     | [2,4[                       | n.a.        | 9           | 35          | -38          | 32          |
|                                                                                     | [4, ∞[                      | n.a.        | -32         | 46          | -3           | 5           |
|                                                                                     | <b>Total</b>                | <b>n.a.</b> | <b>136</b>  | <b>202</b>  | <b>-34</b>   | <b>268</b>  |
| Relative<br>difference in<br>number of<br>diagnoses<br>compared to<br>previous year | [0,1[                       | n.a.        | 7.40        | 6.38        | 1.01         | 9.10        |
|                                                                                     | [1,2[                       | n.a.        | 2.17        | -3.23       | -3.18        | 4.31        |
|                                                                                     | [2,4[                       | n.a.        | 2.92        | 11.04       | -10.80       | 10.19       |
|                                                                                     | [4, ∞[                      | n.a.        | -13.17      | 21.80       | -1.17        | 1.97        |
|                                                                                     | <b>Total</b>                | <b>n.a.</b> | <b>4.45</b> | <b>6.32</b> | <b>-1.00</b> | <b>7.97</b> |
